# Supplementary material
Source: publisher site journal article supplement (https://www.dovepress.com/article/502273)
Supplement: Supplementary file 1 [file get_supplementary_file.php]

**
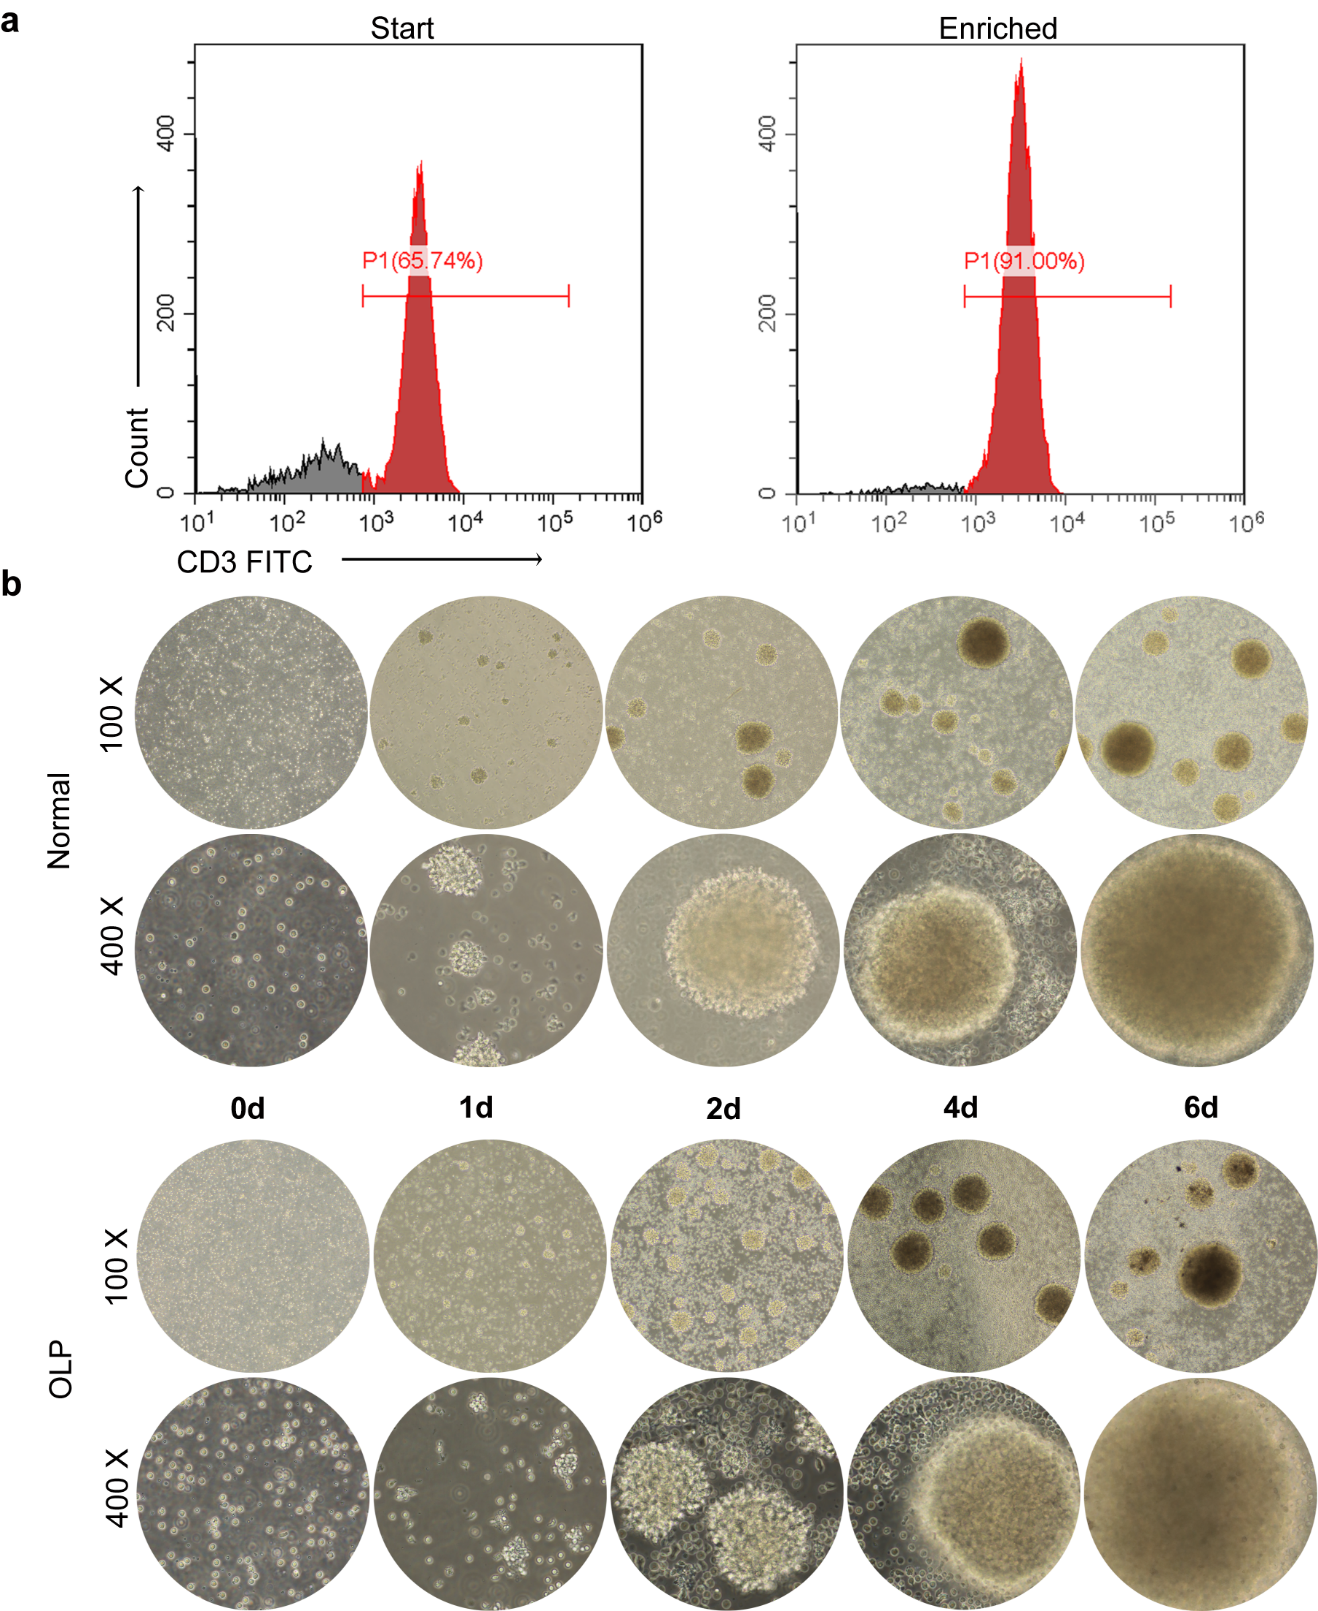
Figure SI Primary T cells were enriched from PBMCs and expanded *in vitro*.** (a) Representative images of extraction purity of primary T cells from PBMCs detected by flow cytometry. (b) Representative images of T cell expansion *in vitro* for 0-6 d showed by microscopy. Abbreviations: PBMCs, Peripheral Blood Mononuclear Cells; OLP, Oral Lichen Planus.
